# Supplementary material for: The evaluating self-management and educational support in severely obese patients awaiting multidisciplinary bariatric care (EVOLUTION) trial: rationale and design
Source: BMC Health Serv Res. 2013 Aug 17;13:321. doi: 10.1186/1472-6963-13-321 (PMC3751526; doi:10.1186/1472-6963-13-321)
Supplement: Additional file 1 — Case Report Forms. [file 1472-6963-13-321-S1.pdf]

# EVOLUTION

*Evaluating Self-Management and Educational Support in  
Extremely Obese Patients Awaiting Multidisciplinary Bariatric Care*

Study ID  -   
Site # Randomization #

Participant Initials   
First Middle Last

## BMI

- Measure **actual** weight and height

|                                    |                                                                                                                                      |               |                         |                                              |
|------------------------------------|--------------------------------------------------------------------------------------------------------------------------------------|---------------|-------------------------|----------------------------------------------|
| <b>Weight</b>                      | <input type="text"/> kg                                                                                                              | <b>Height</b> | <input type="text"/> cm | Reminder: Convert to meters to calculate BMI |
| <b>BMI</b><br>(not for data entry) | <input type="text"/> / <input type="text"/> = <input type="text"/><br>Weight in kg Height in m <sup>2</sup> BMI (kg/m <sup>2</sup> ) |               |                         |                                              |

## Eligibility

- Based on criteria above, is participant **still eligible** for this study (i.e. BMI  $\geq 35$  kg/m<sup>2</sup>) ☐ Yes ☐ No

**If No**, Participant must be excluded

→ Contact the EVOLUTION Study Coordinator

→ Fax this form to *EPICORE Centre at (780) 492-6059 or 1-888-215-5474*

## Consent

- Was informed written consent received ☐ Yes ☐ No

**If Yes**, Proceed to **Randomization** form

**If No**, Participant must be excluded

→ Contact the EVOLUTION Study Coordinator

→ Fax this form to *EPICORE Centre at (780) 492-6059 or 1-888-215-5474*

Form completed by \_\_\_\_\_ Signature \_\_\_\_\_ Date \_\_\_\_/\_\_\_\_/\_\_\_\_  
(please print name) dd mm yyyy

# EVOLUTION

*Evaluating Self-Management and Educational Support in  
Extremely Obese Patients Awaiting Multidisciplinary Bariatric Care*

Study ID

  
Site #

-

  
Randomization #

Participant Initials

  
First Middle Last

## Randomization

### Randomization Instructions:

Go to *EPICORE* Centre website: <https://www.epicore.ualberta.ca>

Click on 'Randomization Service'

Follow website instructions

Record participant's 'Randomization #' below

Date of Randomization

 /  /   
dd mm yyyy

Randomization #

### Treatment Assignment

- ☐ **In person-Module:** *Weight Wise* Community Modules delivered in person
- ☐ **Web-based Module:** *Weight Wise* Community Modules delivered via web
- ☐ **Control:** Educational pamphlets (*Canada's Guide to Healthy Living*)

- Complete **Contact Information** form

Form completed by \_\_\_\_\_ Signature \_\_\_\_\_ Date \_\_\_\_/\_\_\_\_/\_\_\_\_  
(please print name) dd mm yyyy

# EVOLUTION

*Evaluating Self-Management and Educational Support in  
Extremely Obese Patients Awaiting Multidisciplinary Bariatric Care*

Study ID  -   
Site # Randomization #

Participant Initials   
First Middle Last

Participant \_\_\_\_\_  
Last Name First Name and Initial  
\_\_\_\_\_  
Street Address Town/City Province

**Postal Code, Email Address and PHN# to be entered into database**

Postal Code \_\_\_\_\_ Email Address \_\_\_\_\_

PHN#: \_\_\_\_\_

Telephone Number(s) Home ( ) \_\_\_\_\_ - \_\_\_\_\_  
Area code  
Work ( ) \_\_\_\_\_ - \_\_\_\_\_  
Area code  
Cell ( ) \_\_\_\_\_ - \_\_\_\_\_  
Area code

Preferred Contact Time A.M. \_\_\_\_\_ P.M. \_\_\_\_\_

**Secondary Contact Person**  
(Close family member or friend –  
NOT living with the participant)

\_\_\_\_\_  
Last Name First Name

Relationship to Participant \_\_\_\_\_

Telephone Number: Home ( ) \_\_\_\_\_ - \_\_\_\_\_ Work ( ) \_\_\_\_\_ - \_\_\_\_\_  
Area code Area code

Primary Physician Name \_\_\_\_\_

Telephone Number ( ) \_\_\_\_\_ - \_\_\_\_\_ Fax ( ) \_\_\_\_\_ - \_\_\_\_\_

Pharmacy Name \_\_\_\_\_

Telephone Number ( ) \_\_\_\_\_ - \_\_\_\_\_ Fax ( ) \_\_\_\_\_ - \_\_\_\_\_

# EVOLUTION

*Evaluating Self-Management and Educational Support in  
Extremely Obese Patients Awaiting Multidisciplinary Bariatric Care*

Study ID  -   
Site # Randomization #

Participant Initials   
First Middle Last

## Demographics

• Date of Baseline Visit  /  /   
dd mm yyyy

• Date of Birth  /  /   
dd mm yyyy

• Sex ☐ Male ☐ Female

• Current Marital Status

☐ Married/Common-Law ☐ Separated/Divorced ☐ Single/Never Married  
☐ Widowed ☐ Not answered

• Current Highest Level of Education

☐ No high school ☐ Some high school ☐ High school diploma  
☐ Some post secondary ☐ Completed Post Secondary ☐ Not answered

• Current Employment Status

☐ Employed full-time ☐ Employed part-time ☐ Other, specify \_\_\_\_\_  
☐ Unemployed ☐ Employed casual  
☐ Retired ☐ On Disability ☐ Not answered

• Current Household Income (*before taxes & deductions*)

***Although many health expenses are covered by health insurance, there is still a relationship between health and income. Please be assured that, like all other information you have provided, these answers will be kept strictly confidential.***

• What is your best estimate of the total income, before taxes and deductions, of all household members from all sources in the past 12 months?

☐ < 15,000 ☐ 15,000 – 29,999 ☐ 30,000 – 49,999  
☐ 50,000 – 79,999 ☐ ≥ 80,000 ☐ Not answered

**Continue →**

# EVOLUTION

*Evaluating Self-Management and Educational Support in  
Extremely Obese Patients Awaiting Multidisciplinary Bariatric Care*

Study ID

-




Site #

Randomization #

Participant Initials




First

Middle

Last

## Demographics - continued

• Race (*check all that apply*)

☐ Canadian First Nations, Inuit or Métis

*(A person having origins in any of the original peoples of Canada who maintains cultural identification through tribal affiliation or community recognition)*

☐ American Indian or Alaskan Native

*(A person having origins in any of the original peoples of North America who maintains cultural identification through tribal affiliation or community recognition)*

☐ Asian

*(A person having origins in any of the original peoples of the Far East, Southeast Asia or the Indian subcontinent including, eg. China, India, Japan, Korea, Malaysia, Pakistan, Philippine Islands, Cambodia, Thailand or Vietnam)*

☐ Black or African American

*(A person having origins in any of the black racial groups of Africa)*

☐ White

*(A person having origins in any of the original peoples of Europe, North Africa or the Middle East)*

☐ Native Hawaiian or Other Pacific Islander

*(A person having origins in any of the original peoples of Hawaii, Guam, Samoa or other Pacific Islands)*

**Continue →**

# EVOLUTION

*Evaluating Self-Management and Educational Support in  
Extremely Obese Patients Awaiting Multidisciplinary Bariatric Care*

Study ID

  
Site #

-

  
Randomization #

Participant Initials

  
First Middle Last

## Medical History/Obesity-Related Comorbidities (*check all that apply*)

- Do you currently have, any of the following medical conditions?

|                                                            |                                                          |
|------------------------------------------------------------|----------------------------------------------------------|
| Impaired Glucose Tolerance ( <i>Pre-Diabetes</i> )         | <input type="checkbox"/> Yes <input type="checkbox"/> No |
| Diabetes Mellitus                                          | <input type="checkbox"/> Yes <input type="checkbox"/> No |
| Hypertension ( <i>High Blood Pressure</i> )                | <input type="checkbox"/> Yes <input type="checkbox"/> No |
| Dyslipidemia ( <i>High Cholesterol</i> )                   | <input type="checkbox"/> Yes <input type="checkbox"/> No |
| Cardiovascular Disease                                     | <input type="checkbox"/> Yes <input type="checkbox"/> No |
| <b>If Yes, Coronary (<i>Heart Attack, Angina</i>)</b>      | <input type="checkbox"/> Yes <input type="checkbox"/> No |
| Peripheral ( <i>Decreased blood flow in leg arteries</i> ) | <input type="checkbox"/> Yes <input type="checkbox"/> No |
| Cerebral ( <i>Stroke or TIA</i> )                          | <input type="checkbox"/> Yes <input type="checkbox"/> No |
| Heart Failure                                              | <input type="checkbox"/> Yes <input type="checkbox"/> No |
| Sleep Apnea                                                | <input type="checkbox"/> Yes <input type="checkbox"/> No |
| <b>If Yes, On CPAP</b>                                     | <input type="checkbox"/> Yes <input type="checkbox"/> No |
| Asthma                                                     | <input type="checkbox"/> Yes <input type="checkbox"/> No |
| Gastroesophageal Reflux Disease ( <i>Heartburn</i> )       | <input type="checkbox"/> Yes <input type="checkbox"/> No |
| NAFLD ( <i>Fatty Liver</i> )                               | <input type="checkbox"/> Yes <input type="checkbox"/> No |
| Gallbladder Disease or Gallstones                          | <input type="checkbox"/> Yes <input type="checkbox"/> No |
| Osteoarthritis ( <i>Not Rheumatoid Arthritis</i> )         | <input type="checkbox"/> Yes <input type="checkbox"/> No |
| Chronic Renal Disorder ( <i>Kidney Disease</i> )           | <input type="checkbox"/> Yes <input type="checkbox"/> No |
| Polycystic Ovary Syndrome                                  | <input type="checkbox"/> Yes <input type="checkbox"/> No |
| Hypothyroidism                                             | <input type="checkbox"/> Yes <input type="checkbox"/> No |

Continue →

# EVOLUTION

*Evaluating Self-Management and Educational Support in  
Extremely Obese Patients Awaiting Multidisciplinary Bariatric Care*

Study ID

  
Site #

-

  
Randomization #

Participant Initials

  
First Middle Last

## Medical History/Obesity-Related Comorbidities - continued

|                                                                                          |                                                          |
|------------------------------------------------------------------------------------------|----------------------------------------------------------|
| Cancer History                                                                           | <input type="checkbox"/> Yes <input type="checkbox"/> No |
| <b>If Yes,</b> Gastrointestinal ( <i>esophagus, stomach, colon, rectal, pancreatic</i> ) | <input type="checkbox"/> Yes <input type="checkbox"/> No |
| Reproductive ( <i>uterine, ovarian, prostate, breast</i> )                               | <input type="checkbox"/> Yes <input type="checkbox"/> No |
| Other, specify _____                                                                     | <input type="checkbox"/> Yes <input type="checkbox"/> No |
| Lymphedema                                                                               | <input type="checkbox"/> Yes <input type="checkbox"/> No |
| Mental Illness                                                                           | <input type="checkbox"/> Yes <input type="checkbox"/> No |
| <b>If Yes,</b> Depression                                                                | <input type="checkbox"/> Yes <input type="checkbox"/> No |
| Bipolar Disorder                                                                         | <input type="checkbox"/> Yes <input type="checkbox"/> No |
| Abuse                                                                                    | <input type="checkbox"/> Yes <input type="checkbox"/> No |
| <b>If Yes,</b> Sexual                                                                    | <input type="checkbox"/> Yes <input type="checkbox"/> No |
| Mental                                                                                   | <input type="checkbox"/> Yes <input type="checkbox"/> No |
| Physical                                                                                 | <input type="checkbox"/> Yes <input type="checkbox"/> No |
| Post Traumatic Stress Disorder                                                           | <input type="checkbox"/> Yes <input type="checkbox"/> No |
| Binge Eating Disorder                                                                    | <input type="checkbox"/> Yes <input type="checkbox"/> No |
| Attention Deficit Disorder                                                               | <input type="checkbox"/> Yes <input type="checkbox"/> No |
| Addiction                                                                                | <input type="checkbox"/> Yes <input type="checkbox"/> No |
| <b>If Yes,</b> Drug                                                                      | <input type="checkbox"/> Yes <input type="checkbox"/> No |
| Alcohol                                                                                  | <input type="checkbox"/> Yes <input type="checkbox"/> No |
| Smoking                                                                                  | <input type="checkbox"/> Yes <input type="checkbox"/> No |
| <b>If Yes,</b> <input type="checkbox"/> Current                                          |                                                          |
| <input type="checkbox"/> Former [Quit Date: ____ / ____]<br>mm yyyy                      |                                                          |
| Other                                                                                    | <input type="checkbox"/> Yes <input type="checkbox"/> No |
| <b>If Yes,</b> specify _____                                                             |                                                          |

# EVOLUTION

*Evaluating Self-Management and Educational Support in  
Extremely Obese Patients Awaiting Multidisciplinary Bariatric Care*

Study ID  -   
Site # Randomization #

Participant Initials   
First Middle Last

## Blood Pressure/Heart Rate

- Average BP and Heart Rate (recorded with Watch BP Monitor)

| Left Arm BP (systolic/diastolic) | Right Arm BP (systolic/diastolic) | Heart Rate |
|----------------------------------|-----------------------------------|------------|
| ____ / ____ mmHg                 | ____ / ____ mmHg                  | _____ bpm  |

- Record all 3 readings (recorded with Watch BP Monitor)

| # | Left Arm BP (systolic/diastolic) | Right Arm BP (systolic/diastolic) | Heart Rate |
|---|----------------------------------|-----------------------------------|------------|
| 1 | ____ / ____ mmHg                 | ____ / ____ mmHg                  | _____ bpm  |
| 2 | ____ / ____ mmHg                 | ____ / ____ mmHg                  | _____ bpm  |
| 3 | ____ / ____ mmHg                 | ____ / ____ mmHg                  | _____ bpm  |

Form completed by \_\_\_\_\_ Signature \_\_\_\_\_ Date \_\_\_\_/\_\_\_\_/\_\_\_\_  
(please print name) dd mm yyyy

# EVOLUTION

*Evaluating Self-Management and Educational Support in  
Extremely Obese Patients Awaiting Multidisciplinary Bariatric Care*

Study ID  -   
Site # Randomization #

Participant Initials   
First Middle Last

## Blood Pressure/Heart Rate

### Forearm BP

- only record if unable to obtain upper arm BP

Average BP and Heart Rate (recorded with Watch BP Monitor)

| Left Arm BP (systolic/diastolic) | Right Arm BP (systolic/diastolic) | Heart Rate |
|----------------------------------|-----------------------------------|------------|
| ____ / ____ mmHg                 | ____ / ____ mmHg                  | _____ bpm  |

- Record all 3 readings (recorded with Watch BP Monitor)

| # | Left Arm BP (systolic/diastolic) | Right Arm BP (systolic/diastolic) | Heart Rate |
|---|----------------------------------|-----------------------------------|------------|
| 1 | ____ / ____ mmHg                 | ____ / ____ mmHg                  | _____ bpm  |
| 2 | ____ / ____ mmHg                 | ____ / ____ mmHg                  | _____ bpm  |
| 3 | ____ / ____ mmHg                 | ____ / ____ mmHg                  | _____ bpm  |

Form completed by \_\_\_\_\_ Signature \_\_\_\_\_ Date \_\_\_\_ / \_\_\_\_ / \_\_\_\_  
(please print name) dd mm yyyy

# EVOLUTION

# Evaluating Self-Management and Educational Support in Extremely Obese Patients Awaiting Multidisciplinary Bariatric Care

**Study ID**



 -

Site #                      Randomization #

**Participant Initials**

|       |        |      |
|-------|--------|------|
|       |        |      |
| First | Middle | Last |

**Timepoint** ☐ **Baseline** ☐ **9 Month**

- Is participant **regularly** taking any **prescription** medications ☐ Yes ☐ No

**If Yes,** Total number of prescription medications \_\_\_\_\_

List prescription medications below (*generic name only*)

[illegible]

**Continue →**

# EVOLUTION

*Evaluating Self-Management and Educational Support in  
Extremely Obese Patients Awaiting Multidisciplinary Bariatric Care*

Study ID  -   
Site # Randomization #

Participant Initials   
First Middle Last

Timepoint  Baseline  9 Month

## Current Medications - continued

### • Medication Adherence

Which of the following categories best describes your use of your medications?

- ☐ Take all your pills
- ☐ Take 75-99% of your pills
- ☐ Take 50-74% of your pills
- ☐ Take less than 50% of your pills
- ☐ Take none of your pills
- ☐ Don't know

• Is participant taking any over-the-counter weight loss products ☐ Yes ☐ No

If Yes, How many \_\_\_\_\_

Brand Name(s)

1. \_\_\_\_\_

2. \_\_\_\_\_

3. \_\_\_\_\_

Form completed by \_\_\_\_\_ Signature \_\_\_\_\_ Date \_\_\_\_/\_\_\_\_/\_\_\_\_  
(please print name) dd mm yyyy

# EVOLUTION

*Evaluating Self-Management and Educational Support in  
Extremely Obese Patients Awaiting Multidisciplinary Bariatric Care*

Study ID  -   
Site # Randomization #

Participant Initials   
First Middle Last

Timepoint  Baseline  9 Month

**At Baseline:** labs must be within 3 months previous or 2 weeks after

**At 9 Months:** labs must be within 2 weeks before/after

| Lab N/A                  | Lab Test         | Lab Value                                                        | Unit of Collection         | Date of Collection <input type="text"/> / <input type="text"/> / <input type="text"/><br>dd mm yyyy |                                                                         |
|--------------------------|------------------|------------------------------------------------------------------|----------------------------|-----------------------------------------------------------------------------------------------------|-------------------------------------------------------------------------|
|                          |                  |                                                                  |                            | Same Date of Collection                                                                             | If Date of Collection is different from above, enter below (dd/mm/yyyy) |
| <input type="checkbox"/> | HbA1c            | <input type="text"/> <input type="text"/> . <input type="text"/> | %                          | <input type="checkbox"/>                                                                            | <input type="text"/> / <input type="text"/> / <input type="text"/>      |
| <input type="checkbox"/> | Creatinine       | <input type="text"/> <input type="text"/> <input type="text"/>   | μmol/L                     | <input type="checkbox"/>                                                                            | <input type="text"/> / <input type="text"/> / <input type="text"/>      |
| <input type="checkbox"/> | GFR (Calculated) | <input type="text"/> <input type="text"/>                        | mL/min/1.73/m <sup>2</sup> | <input type="checkbox"/>                                                                            | <input type="text"/> / <input type="text"/> / <input type="text"/>      |
| <input type="checkbox"/> | ALT              | <input type="text"/> <input type="text"/> <input type="text"/>   | U/L                        | <input type="checkbox"/>                                                                            | <input type="text"/> / <input type="text"/> / <input type="text"/>      |

## Fasting Lipid Panel:

|                          |                   |                                                                                       |        |                          |                                                                    |
|--------------------------|-------------------|---------------------------------------------------------------------------------------|--------|--------------------------|--------------------------------------------------------------------|
| <input type="checkbox"/> | Total Cholesterol | <input type="text"/> . <input type="text"/> <input type="text"/>                      | mmol/L | <input type="checkbox"/> | <input type="text"/> / <input type="text"/> / <input type="text"/> |
| <input type="checkbox"/> | Triglycerides     | <input type="text"/> <input type="text"/> . <input type="text"/> <input type="text"/> | mmol/L | <input type="checkbox"/> | <input type="text"/> / <input type="text"/> / <input type="text"/> |
| <input type="checkbox"/> | LDL               | <input type="text"/> . <input type="text"/> <input type="text"/>                      | mmol/L | <input type="checkbox"/> | <input type="text"/> / <input type="text"/> / <input type="text"/> |
| <input type="checkbox"/> | HDL               | <input type="text"/> . <input type="text"/> <input type="text"/>                      | mmol/L | <input type="checkbox"/> | <input type="text"/> / <input type="text"/> / <input type="text"/> |
| <input type="checkbox"/> | Total: HDL Ratio  | <input type="text"/> . <input type="text"/>                                           |        | <input type="checkbox"/> | <input type="text"/> / <input type="text"/> / <input type="text"/> |

Form completed by \_\_\_\_\_ Signature \_\_\_\_\_ Date  /  /   
(please print name) dd mm yyyy

# EVOLUTION

*Evaluating Self-Management and Educational Support in  
Extremely Obese Patients Awaiting Multidisciplinary Bariatric Care*

## Questionnaire Package

Dear Study Participant

These questionnaires ask about your health. Please select the answer that best describes how you feel. There are no right or wrong answers. No matter what answers you record, you are guaranteed the same treatment. You may leave an answer blank if you object to the question. If you have any questions or concerns, you may direct them to the research staff.

The information you provide will be kept confidential. Only the investigators will have access to the information collected in this study. Any report or presentation of this study will not identify you by name.

Thank you for your time

Date these questionnaires were completed

\_\_\_\_ / \_\_\_\_ / \_\_\_\_  
Day Month Year

**EVOLUTION**

*Evaluating Self-Management and Educational Support in  
Extremely Obese Patients Awaiting Multidisciplinary Bariatric Care*

Study ID  -   
Site # Randomization #

Participant Initials   
First Middle Last

Visit  **Baseline**  **3 Month**  **6 Month**  **9 Month**

***We would like to find out how satisfied you have felt with the health care you have been receiving.***

***How strongly do you AGREE or DISAGREE with this statement? On the line beside the statement, mark the checkbox below the opinion which is closest to your own view.***

(Check one box ONLY)

|    |                                                              | <b>Strongly Agree</b>    | <b>Agree</b>             | <b>Uncertain</b>         | <b>Disagree</b>          | <b>Strongly Disagree</b> |
|----|--------------------------------------------------------------|--------------------------|--------------------------|--------------------------|--------------------------|--------------------------|
| 1. | The medical care I have been receiving is just about perfect | <input type="checkbox"/> |

# EVOLUTION

*Evaluating Self-Management and Educational Support in  
Extremely Obese Patients Awaiting Multidisciplinary Bariatric Care*

Study ID  -   
Site # Randomization #

Participant Initials   
First Middle Last

Visit  Baseline  3 Month  6 Month  9 Month

**This survey asks for your views about your health. This information will help keep track of how you feel and how well you are able to do your usual activities. For each one of the following questions, please mark the one checkbox that best describes your answer.**

**1. In general would you say your health is:**

☐ Excellent ☐ Very Good ☐ Good ☐ Fair ☐ Poor

**2. The following questions are about activities you might do during a typical day. Does your health now limit you in these activities? If so, how much?**

a. Moderate activities, such as moving a table, pushing a vacuum cleaner, bowling or playing golf

☐ Yes, limited a lot ☐ Yes, limited a little ☐ No, not limited at all

b. Climbing several flights of stairs

☐ Yes, limited a lot ☐ Yes, limited a little ☐ No, not limited at all

**3. During the past 4 weeks, how much of the time have you had any of the following problems with your work or other regular daily activities as a result of your physical health?**

a. Accomplished less than you would like

☐ All the time ☐ Most of the time ☐ Some of the time ☐ A little of the time ☐ None of the time

b. Were limited in the kind of work or other activities

☐ All the time ☐ Most of the time ☐ Some of the time ☐ A little of the time ☐ None of the time

**4. During the past 4 weeks, how much of the time have you had any of the following problems with your work or other regular daily activities as a result of any emotional problems (such as feeling depressed or anxious)?**

a. Accomplished less than you would like

☐ All the time ☐ Most of the time ☐ Some of the time ☐ A little of the time ☐ None of the time

b. Did work or other activities less carefully than usual

☐ All the time ☐ Most of the time ☐ Some of the time ☐ A little of the time ☐ None of the time

**EVOLUTION**

*Evaluating Self-Management and Educational Support in  
Extremely Obese Patients Awaiting Multidisciplinary Bariatric Care*

|                 |                      |                 |                      |                      |                      |                             |                      |                      |                      |
|-----------------|----------------------|-----------------|----------------------|----------------------|----------------------|-----------------------------|----------------------|----------------------|----------------------|
| <b>Study ID</b> | <input type="text"/> | -               | <input type="text"/> | <input type="text"/> | <input type="text"/> | <b>Participant Initials</b> | <input type="text"/> | <input type="text"/> | <input type="text"/> |
|                 | Site #               |                 | Randomization #      |                      |                      |                             | First                | Middle               | Last                 |
| <b>Visit</b>    | <input type="text"/> | <b>Baseline</b> | <input type="text"/> | <b>3 Month</b>       | <input type="text"/> | <b>6 Month</b>              | <input type="text"/> | <b>9 Month</b>       |                      |

**5. During the past 4 weeks, how much did pain interfere with your normal work (including both work outside the home and housework)?**

☐ Not at all      ☐ A little bit      ☐ Moderately      ☐ Quite a bit      ☐ Extremely

**6. These questions are about how you feel and how things have been with you during the past 4 weeks. For each question, please give the one answer that comes closest to the way you have been feeling. How much of the time during the past 4 weeks...**

a. Have you felt calm and peaceful?

☐ All the time    ☐ Most of the time    ☐ Some of the time    ☐ A little of the time    ☐ None of the time

b. Did you have a lot of energy?

☐ All the time    ☐ Most of the time    ☐ Some of the time    ☐ A little of the time    ☐ None of the time

c. Have felt downhearted and depressed?

☐ All the time    ☐ Most of the time    ☐ Some of the time    ☐ A little of the time    ☐ None of the time

**7. During the past 4 weeks, how much of the time has your physical health or emotional problems interfered with your social activities (like visiting with friends, relatives, etc)?**

☐ All the time    ☐ Most of the time    ☐ Some of the time    ☐ A little of the time    ☐ None of the time

**EVOLUTION**

*Evaluating Self-Management and Educational Support in  
Extremely Obese Patients Awaiting Multidisciplinary Bariatric Care*

**Study ID****-**

Site #

Randomization #

**Participant Initials**

First

Middle

Last

**Visit****Baseline****3 Month****6 Month****9 Month****Health Questionnaire****English version for Canada**

# EVOLUTION

*Evaluating Self-Management and Educational Support in  
Extremely Obese Patients Awaiting Multidisciplinary Bariatric Care*

Study ID  -   
Site # Randomization #

Participant Initials   
First Middle Last

Visit  Baseline  3 Month  6 Month  9 Month

By placing a check-mark in one box in each group below, please indicate which statements best describe your own state of health today.

## Mobility

I have no problems in walking about ☐  
I have some problems in walking about ☐  
I am confined to bed ☐

## Self-Care

I have no problems with self-care ☐  
I have some problems washing or dressing myself ☐  
I am unable to wash or dress myself ☐

## Usual Activities (e.g. work, study, housework, family or leisure activities)

I have no problems with performing my usual activities ☐  
I have some problems with performing my usual activities ☐  
I am unable to perform my usual activities ☐

## Pain/Discomfort

I have no pain or discomfort ☐  
I have moderate pain or discomfort ☐  
I have extreme pain or discomfort ☐

## Anxiety/Depression

I am not anxious or depressed ☐  
I am moderately anxious or depressed ☐  
I am extremely anxious or depressed ☐

Canada (English) © 1999 EuroQol Group. EQ-5D™ is a trade mark of the EuroQol Group

EVOLUTION EQ-5D v1.doc

©2013 EPICORE Centre

05 February 2013

**Fax completed forms to EPICORE Centre (780) 492-6059 or 1-888-215-5474**

# EVOLUTION

*Evaluating Self-Management and Educational Support in  
Extremely Obese Patients Awaiting Multidisciplinary Bariatric Care*

Study ID

-

Site #

Randomization #

Participant Initials

First

Middle

Last

Visit

Baseline

3 Month

6 Month

9 Month

To help people say how good or bad their state of health is, we have drawn a scale (rather like a thermometer) on which the best state you can imagine is marked 100 and the worst state you can imagine is marked 0.

We would like you to indicate on this scale how good or bad your own health is today, in your opinion. Please do this by drawing a line from the box below to whichever point on the scale indicates how good or bad your state of health is today.

**Your own  
state of health  
today**

Best  
imaginable  
state of health

100

90

80

70

60

50

40

30

20

10

0

Worst  
imaginable  
state of health

# EVOLUTION

*Evaluating Self-Management and Educational Support in  
Extremely Obese Patients Awaiting Multidisciplinary Bariatric Care*

Study ID  -   
Site # Randomization #

Participant Initials   
First Middle Last

Visit  Baseline  3 Month  6 Month  9 Month

Over the **last 2 weeks**, how often have you been bothered by any of the following problems?

*Mark one box only in answer to each question*

|                                                                                                                                                                             | Not at all               | Several days             | More than half the days  | Nearly every day         |
|-----------------------------------------------------------------------------------------------------------------------------------------------------------------------------|--------------------------|--------------------------|--------------------------|--------------------------|
| 1. Little interest or pleasure in doing things                                                                                                                              | <input type="checkbox"/> | <input type="checkbox"/> | <input type="checkbox"/> | <input type="checkbox"/> |
| 2. Feeling down, depressed, or hopeless                                                                                                                                     | <input type="checkbox"/> | <input type="checkbox"/> | <input type="checkbox"/> | <input type="checkbox"/> |
| 3. Trouble falling or staying asleep or sleeping too much                                                                                                                   | <input type="checkbox"/> | <input type="checkbox"/> | <input type="checkbox"/> | <input type="checkbox"/> |
| 4. Feeling tired or having little energy                                                                                                                                    | <input type="checkbox"/> | <input type="checkbox"/> | <input type="checkbox"/> | <input type="checkbox"/> |
| 5. Poor appetite or overeating                                                                                                                                              | <input type="checkbox"/> | <input type="checkbox"/> | <input type="checkbox"/> | <input type="checkbox"/> |
| 6. Feeling bad about yourself – or that you are a failure or have let yourself or your family down                                                                          | <input type="checkbox"/> | <input type="checkbox"/> | <input type="checkbox"/> | <input type="checkbox"/> |
| 7. Trouble concentrating on things, such as reading the newspaper or watching television                                                                                    | <input type="checkbox"/> | <input type="checkbox"/> | <input type="checkbox"/> | <input type="checkbox"/> |
| 8. Moving or speaking so slowly that other people could have noticed? Or the opposite – being so fidgety or restless that you have been moving around a lot more than usual | <input type="checkbox"/> | <input type="checkbox"/> | <input type="checkbox"/> | <input type="checkbox"/> |

**If you checked off any problems, how difficult have these problems made it for you to do your work, take care of things at home, or get along with other people?**

| Not difficult at all     | Somewhat difficult       | Very difficult           | Extremely difficult      |
|--------------------------|--------------------------|--------------------------|--------------------------|
| <input type="checkbox"/> | <input type="checkbox"/> | <input type="checkbox"/> | <input type="checkbox"/> |

Developed by Drs. Robert L. Spitzer, Janet B.W. Williams, Hurt Kroenke and colleagues, with an educational grant from Pfizer Inc. No permission required to reproduce, translate, display or distribute

EVOLUTION PHQ 8 v1.doc

©2013 EPICORE Centre

05 February 2013

**Fax completed forms to EPICORE Centre (780) 492-6059 or 1-888-215-5474**

# EVOLUTION

*Evaluating Self-Management and Educational Support in  
Extremely Obese Patients Awaiting Multidisciplinary Bariatric Care*

Study ID  -   
Site # Randomization #

Participant Initials   
First Middle Last

Visit  Baseline  3 Month  6 Month  9 Month

- How ready are you to make changes in your life to reduce your weight?

*Please mark an 'x' on the line below to indicate your response*

## Readiness to Change Scale

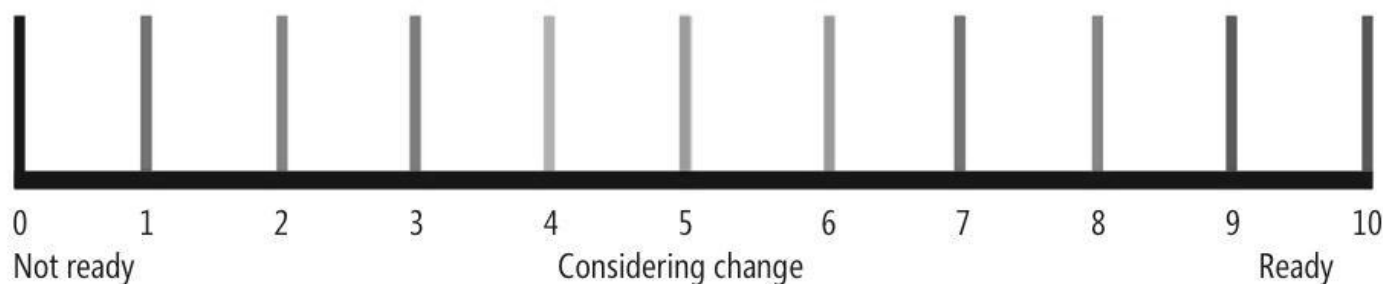

# EVOLUTION

*Evaluating Self-Management and Educational Support in  
Extremely Obese Patients Awaiting Multidisciplinary Bariatric Care*

Study ID  -   
Site # Randomization #

Participant Initials   
First Middle Last

Visit  Baseline  3 Month  6 Month  9 Month

Listed below are a number of situations that lead some people to eat. We would like to know **how confident** you are that you would **not** eat in each situation.

Circle the number that best describes your feelings of **confidence to not eat food in each situation**

1. I can resist eating when I am anxious (nervous).

|               |   |   |                    |   |   |                |   |   |   |
|---------------|---|---|--------------------|---|---|----------------|---|---|---|
| 0             | 1 | 2 | 3                  | 4 | 5 | 6              | 7 | 8 | 9 |
| Not confident |   |   | Somewhat Confident |   |   | Very Confident |   |   |   |

2. I can control my eating on the weekends.

|               |   |   |                    |   |   |                |   |   |   |
|---------------|---|---|--------------------|---|---|----------------|---|---|---|
| 0             | 1 | 2 | 3                  | 4 | 5 | 6              | 7 | 8 | 9 |
| Not confident |   |   | Somewhat Confident |   |   | Very Confident |   |   |   |

3. I can resist eating even when I have to say "NO" to others.

|               |   |   |                    |   |   |                |   |   |   |
|---------------|---|---|--------------------|---|---|----------------|---|---|---|
| 0             | 1 | 2 | 3                  | 4 | 5 | 6              | 7 | 8 | 9 |
| Not confident |   |   | Somewhat Confident |   |   | Very Confident |   |   |   |

4. I can resist eating when I feel physically run down.

|               |   |   |                    |   |   |                |   |   |   |
|---------------|---|---|--------------------|---|---|----------------|---|---|---|
| 0             | 1 | 2 | 3                  | 4 | 5 | 6              | 7 | 8 | 9 |
| Not confident |   |   | Somewhat Confident |   |   | Very Confident |   |   |   |

5. I can resist eating when I am watching TV.

|               |   |   |                    |   |   |                |   |   |   |
|---------------|---|---|--------------------|---|---|----------------|---|---|---|
| 0             | 1 | 2 | 3                  | 4 | 5 | 6              | 7 | 8 | 9 |
| Not confident |   |   | Somewhat Confident |   |   | Very Confident |   |   |   |

**Continue →**

# EVOLUTION

*Evaluating Self-Management and Educational Support in  
Extremely Obese Patients Awaiting Multidisciplinary Bariatric Care*

Study ID  -   
Site # Randomization #

Participant Initials   
First Middle Last

Visit  Baseline  3 Month  6 Month  9 Month

Circle the number that best describes your feelings of **confidence to not eat food in each situation**

6. I can resist eating when I am depressed (or down).

0 1 2 3 4 5 6 7 8 9  
Not confident Somewhat Confident Very Confident

7. I can resist eating when there are many different kinds of food available.

0 1 2 3 4 5 6 7 8 9  
Not confident Somewhat Confident Very Confident

8. I can resist eating even when I feel it's impolite to refuse a second helping.

0 1 2 3 4 5 6 7 8 9  
Not confident Somewhat Confident Very Confident

9. I can resist eating even when I have a headache.

0 1 2 3 4 5 6 7 8 9  
Not confident Somewhat Confident Very Confident

10. I can resist eating when I am reading.

0 1 2 3 4 5 6 7 8 9  
Not confident Somewhat Confident Very Confident

11. I can resist eating when I am angry (or irritable).

0 1 2 3 4 5 6 7 8 9  
Not confident Somewhat Confident Very Confident

**Continue →**

# EVOLUTION

*Evaluating Self-Management and Educational Support in  
Extremely Obese Patients Awaiting Multidisciplinary Bariatric Care*

Study ID  -   
Site # Randomization #

Participant Initials   
First Middle Last

Visit  Baseline  3 Month  6 Month  9 Month

Circle the number that best describes your feelings of **confidence to not eat food in each situation**

12. I can resist eating even when I am at a party.

0 1 2 3 4 5 6 7 8 9  
Not confident Somewhat Confident Very Confident

13. I can resist eating even when others are pressuring me to eat.

0 1 2 3 4 5 6 7 8 9  
Not confident Somewhat Confident Very Confident

14. I can resist eating when I am in pain.

0 1 2 3 4 5 6 7 8 9  
Not confident Somewhat Confident Very Confident

15. I can resist eating just before going to bed.

0 1 2 3 4 5 6 7 8 9  
Not confident Somewhat Confident Very Confident

16. I can resist eating when I have experienced failure.

0 1 2 3 4 5 6 7 8 9  
Not confident Somewhat Confident Very Confident

17. I can resist eating even when high-calorie foods are available.

0 1 2 3 4 5 6 7 8 9  
Not confident Somewhat Confident Very Confident

**Continue →**

# EVOLUTION

*Evaluating Self-Management and Educational Support in  
Extremely Obese Patients Awaiting Multidisciplinary Bariatric Care*

Study ID  -   
Site # Randomization #

Participant Initials   
First Middle Last

Visit  Baseline  3 Month  6 Month  9 Month

Circle the number that best describes your feelings of **confidence to not eat food in each situation**

18. I can resist eating even when I think others will be upset if I don't eat.

|               |   |   |                    |   |   |   |                |   |   |
|---------------|---|---|--------------------|---|---|---|----------------|---|---|
| 0             | 1 | 2 | 3                  | 4 | 5 | 6 | 7              | 8 | 9 |
| Not confident |   |   | Somewhat Confident |   |   |   | Very Confident |   |   |

19. I can resist eating when I feel uncomfortable.

|               |   |   |                    |   |   |   |                |   |   |
|---------------|---|---|--------------------|---|---|---|----------------|---|---|
| 0             | 1 | 2 | 3                  | 4 | 5 | 6 | 7              | 8 | 9 |
| Not confident |   |   | Somewhat Confident |   |   |   | Very Confident |   |   |

20. I can resist eating when I am happy.

|               |   |   |                    |   |   |   |                |   |   |
|---------------|---|---|--------------------|---|---|---|----------------|---|---|
| 0             | 1 | 2 | 3                  | 4 | 5 | 6 | 7              | 8 | 9 |
| Not confident |   |   | Somewhat Confident |   |   |   | Very Confident |   |   |

Clark, M.M.; Abrams, D.B.; Niaura, R.S.; Eaton, C.A.; and Rossi, J.S. (1991). Self-efficacy in weight management. *Journal of Consulting and Clinical Psychology*, 59(5), 739-744

EVOLUTION WEL Questionnaire v1.doc

05 February 2013

©2013 EPICORE Centre

**Fax completed forms to EPICORE Centre (780) 492-6059 or 1-888-215-5474**

**EVOLUTION***Evaluating Self-Management and Educational Support in  
Extremely Obese Patients Awaiting Multidisciplinary Bariatric Care*

Study ID

-

Site #

Randomization #

Participant Initials

First

Middle

Last

Visit

**Baseline****3 Month****6 Month****9 Month**

- 
1. How often do you have problems learning about your medical condition because of difficulty understanding written information?
- ☐ All of the time
- ☐ Most of the time
- ☐ Some of the time
- ☐ A little of the time
- ☐ None of the time
2. How confident are you filling out medical forms by yourself?
- ☐ All of the time
- ☐ Most of the time
- ☐ Some of the time
- ☐ A little of the time
- ☐ None of the time
3. How often do you have someone like a family member, friend, hospital or clinic worker or caregiver, help you read health plan materials (such as written information about your health or care you are offered)?
- ☐ All of the time
- ☐ Most of the time
- ☐ Some of the time
- ☐ A little of the time
- ☐ None of the time

# EVOLUTION

*Evaluating Self-Management and Educational Support in  
Extremely Obese Patients Awaiting Multidisciplinary Bariatric Care*

Study ID  -     
Site # Randomization #

Participant Initials     
First Middle Last

Visit  Baseline  3 Month  6 Month  9 Month

***We would like to find out how satisfied you have felt with the health care you have been receiving.***

***How strongly do you AGREE or DISAGREE with this statement? On the line beside the statement, mark the checkbox below the opinion which is closest to your own view.***

**(Check one box ONLY)**

|    |                                                                      | Strongly Agree           | Agree                    | Uncertain                | Disagree                 | Strongly Disagree        |
|----|----------------------------------------------------------------------|--------------------------|--------------------------|--------------------------|--------------------------|--------------------------|
| 1. | I am dissatisfied with some things about the medical care I received | <input type="checkbox"/> |

# EVOLUTION

*Evaluating Self-Management and Educational Support in  
Extremely Obese Patients Awaiting Multidisciplinary Bariatric Care*

## FACSIMILE TRANSMITTAL SHEET

**To:** Dr. \_\_\_\_\_

**Fax #** \_\_\_\_\_

**Re:** \_\_\_\_\_

**Date** \_\_\_\_\_

Dear Colleague,

The above-named patient is wait-listed for Bariatric Care and has been enrolled in the CIHR-funded *EVOLUTION Trial*. This 9-month randomized controlled trial is being performed in partnership with Alberta Health Services and will compare three different educational interventions designed to improve patients' success once in bariatric care. Patients will receive three months of education and then be followed within the bariatric clinic for six months. Outcomes include body weight, quality of life and costs.

Patients will have bloodwork at baseline and 9 months (*fasting lipids, creatinine, A1c*). Please note that to avoid unnecessary duplication of testing, this bloodwork will be available on *NetCare*.

Best Regards,

Raj Padwal, MD, FRCP(C)  
Principal Investigator  
EVOLUTION Trial

# EVOLUTION

*Evaluating Self-Management and Educational Support in  
Extremely Obese Patients Awaiting Multidisciplinary Bariatric Care*

Study ID  -   
Site # Randomization #

Participant Initials   
First Middle Last

Visit  3 Month  6 Month  9 Month

- Were you able to conduct this **Follow Up** visit ☐ Yes ☐ No

If Yes, Date of visit \_\_\_\_ / \_\_\_\_ / \_\_\_\_  
dd mm yyyy

If No, Specify reason

- ☐ Missed Visit
- ☐ Early Withdrawal → complete **Early Withdrawal** form
- ☐ Death → complete **Early Withdrawal** form
- ☐ Other

## Weight Wise Clinic

- Since the last contact, has participant started **treatment** (*not assessment*) ☐ Yes ☐ No

If Yes, Date of first **treatment** (*not assessment*) visit \_\_\_\_ / \_\_\_\_ / \_\_\_\_  
dd mm yyyy

- Clinic Interventions
- Has participant utilized any of the following services at the *Weight Wise Clinic*

|                                                |                                                          |                           |
|------------------------------------------------|----------------------------------------------------------|---------------------------|
| Dietitian                                      | <input type="checkbox"/> Yes <input type="checkbox"/> No | If Yes, # of Visits _____ |
| Physiotherapy                                  | <input type="checkbox"/> Yes <input type="checkbox"/> No | If Yes, # of Visits _____ |
| Psychologist ( <i>alone or group therapy</i> ) | <input type="checkbox"/> Yes <input type="checkbox"/> No | If Yes, # of Visits _____ |
| Occupational Therapy                           | <input type="checkbox"/> Yes <input type="checkbox"/> No | If Yes, # of Visits _____ |
| Psychiatrist                                   | <input type="checkbox"/> Yes <input type="checkbox"/> No | If Yes, # of Visits _____ |
| Social Worker                                  | <input type="checkbox"/> Yes <input type="checkbox"/> No | If Yes, # of Visits _____ |
| Physician                                      | <input type="checkbox"/> Yes <input type="checkbox"/> No | If Yes, # of Visits _____ |
| Sleep Specialist                               | <input type="checkbox"/> Yes <input type="checkbox"/> No | If Yes, # of Visits _____ |

**Continue →**

# EVOLUTION

*Evaluating Self-Management and Educational Support in  
Extremely Obese Patients Awaiting Multidisciplinary Bariatric Care*

Study ID  -   
Site # Randomization #

Participant Initials   
First Middle Last

Visit  3 Month  6 Month  9 Month

## Weight Wise Group Workshops

*To be completed for all participants (irrespective of group assignment)*

- Since the last contact, Has participant completed any *In-person Weight Wise Modules* ☐ Yes ☐ No

If Yes, Record workshops attended

|                                                                       |                                                          |
|-----------------------------------------------------------------------|----------------------------------------------------------|
| Getting Started: Planning for Success                                 | <input type="checkbox"/> Yes <input type="checkbox"/> No |
| Lifestyle Change: A Toolkit for Success                               | <input type="checkbox"/> Yes <input type="checkbox"/> No |
| Nutrition: Finding Balance: The Role of Calories in Weight Management | <input type="checkbox"/> Yes <input type="checkbox"/> No |
| Managing Hunger and Appetite                                          | <input type="checkbox"/> Yes <input type="checkbox"/> No |
| Moving Matters: Including Physical Activity in your Day               | <input type="checkbox"/> Yes <input type="checkbox"/> No |
| Nutrition: The Truth about What Works in Weight Management            | <input type="checkbox"/> Yes <input type="checkbox"/> No |
| Nutrition: I know I should Eat Healthy, But How?                      | <input type="checkbox"/> Yes <input type="checkbox"/> No |
| Nutrition: Eating Away from Home and during Special Occasions         | <input type="checkbox"/> Yes <input type="checkbox"/> No |
| Minding Stress: Effectively Reduce and Manage the Stress in your Life | <input type="checkbox"/> Yes <input type="checkbox"/> No |

**Continue →**

# EVOLUTION

*Evaluating Self-Management and Educational Support in  
Extremely Obese Patients Awaiting Multidisciplinary Bariatric Care*

Study ID  -   
Site # Randomization #

Participant Initials   
First Middle Last

Visit  3 Month  6 Month  9 Month

## Weight Wise On-Line Modules

*To be completed ONLY for participants in the Web-based Module Treatment Assignment*

- Since the last contact, Has participant completed any *Web-based Weight Wise Modules* ☐ Yes ☐ No

If Yes, Record modules completed:

|                                                                                                                      |                                                          |
|----------------------------------------------------------------------------------------------------------------------|----------------------------------------------------------|
| Getting Started: Planning for Success                                                                                | <input type="checkbox"/> Yes <input type="checkbox"/> No |
| Getting Started: Benefits & Challenges                                                                               | <input type="checkbox"/> Yes <input type="checkbox"/> No |
| Getting Started: Skills for Weight Management Success                                                                | <input type="checkbox"/> Yes <input type="checkbox"/> No |
| Finding Balance: The Role of Calories in Weight Management:<br>– Calories & Diets                                    | <input type="checkbox"/> Yes <input type="checkbox"/> No |
| Finding Balance: The Role of Calories in Weight Management:<br>– Top 5 Calorie Culprits & Tips for Reducing Calories | <input type="checkbox"/> Yes <input type="checkbox"/> No |
| Managing Hunger & Appetite: Managing Hunger                                                                          | <input type="checkbox"/> Yes <input type="checkbox"/> No |
| Managing Hunger & Appetite: Controlling Your Appetite                                                                | <input type="checkbox"/> Yes <input type="checkbox"/> No |
| Moving Matters: How does moving matter?                                                                              | <input type="checkbox"/> Yes <input type="checkbox"/> No |
| Moving Matters: Help me get moving! I'm ready!                                                                       | <input type="checkbox"/> Yes <input type="checkbox"/> No |
| More on Nutrition: Transform your Eating for Weight Loss                                                             | <input type="checkbox"/> Yes <input type="checkbox"/> No |
| More on Nutrition: Meal planning Tips and Label Reading                                                              | <input type="checkbox"/> Yes <input type="checkbox"/> No |
| More on Nutrition: Eating Out and Special Occasions                                                                  | <input type="checkbox"/> Yes <input type="checkbox"/> No |
| A Good Night's Sleep                                                                                                 | <input type="checkbox"/> Yes <input type="checkbox"/> No |

**Continue →**

# EVOLUTION

*Evaluating Self-Management and Educational Support in  
Extremely Obese Patients Awaiting Multidisciplinary Bariatric Care*

Study ID  -   
Site # Randomization #

Participant Initials   
First Middle Last

Visit  3 Month  6 Month  9 Month

## Demographics

- Current Marital Status

- ☐ Married/Common-Law
 ☐ Separated/Divorced
 ☐ Single/Never Married  
☐ Widowed
 ☐ Not answered

## Blood Pressure/Heart Rate

- Average BP and Heart Rate (*recorded with Watch BP Monitor*)

| Left Arm BP ( <i>systolic/diastolic</i> ) | Right Arm BP ( <i>systolic/diastolic</i> ) | Heart Rate |
|-------------------------------------------|--------------------------------------------|------------|
| ____ / ____ mmHg                          | ____ / ____ mmHg                           | _____ bpm  |

- Record all 3 readings (*recorded with Watch BP Monitor*)

| # | Left Arm BP ( <i>systolic/diastolic</i> ) | Right Arm BP ( <i>systolic/diastolic</i> ) | Heart Rate |
|---|-------------------------------------------|--------------------------------------------|------------|
| 1 | ____ / ____ mmHg                          | ____ / ____ mmHg                           | _____ bpm  |
| 2 | ____ / ____ mmHg                          | ____ / ____ mmHg                           | _____ bpm  |
| 3 | ____ / ____ mmHg                          | ____ / ____ mmHg                           | _____ bpm  |

## Anthropometric Measures

|        |          |
|--------|----------|
| Weight | _____ kg |
|--------|----------|

Continue →

# EVOLUTION

*Evaluating Self-Management and Educational Support in  
Extremely Obese Patients Awaiting Multidisciplinary Bariatric Care*

Study ID  -   
Site # Randomization #

Participant Initials   
First Middle Last

Visit  3 Month  6 Month  9 Month

## Blood Pressure/Heart Rate

### Forearm BP

- only record if unable to obtain upper arm BP

Average BP and Heart Rate (recorded with Watch BP Monitor)

| Left Arm BP (systolic/diastolic) | Right Arm BP (systolic/diastolic) | Heart Rate |
|----------------------------------|-----------------------------------|------------|
| ____ / ____ mmHg                 | ____ / ____ mmHg                  | _____ bpm  |

- Record all 3 readings (recorded with Watch BP Monitor)

| # | Left Arm BP (systolic/diastolic) | Right Arm BP (systolic/diastolic) | Heart Rate |
|---|----------------------------------|-----------------------------------|------------|
| 1 | ____ / ____ mmHg                 | ____ / ____ mmHg                  | _____ bpm  |
| 2 | ____ / ____ mmHg                 | ____ / ____ mmHg                  | _____ bpm  |
| 3 | ____ / ____ mmHg                 | ____ / ____ mmHg                  | _____ bpm  |

Form completed by \_\_\_\_\_ Signature \_\_\_\_\_ Date \_\_\_\_/\_\_\_\_/\_\_\_\_  
(please print name) dd mm yyyy

# EVOLUTION

*Evaluating Self-Management and Educational Support in  
Extremely Obese Patients Awaiting Multidisciplinary Bariatric Care*

Study ID

  
Site #

-

  
Randomization #

Participant Initials

  
First Middle Last

Visit

3 Month

6 Month

9 Month

## Smoking History

- Since the last contact, Has there been a change in smoking status ☐ Yes ☐ No

If Yes, Type of Change: ☐ Restarted ☐ Quit

## Surgery

- Since the last contact, Has participant had bariatric surgery ☐ Yes ☐ No

If Yes, complete **Bariatric Surgery** form

## Weight-Wise Clinic Discharge

- Since the last contact, Was participant discharged from the **Weight Wise Clinic** ☐ Yes ☐ No

If Yes, Complete **Weight Wise Clinic Discharge** form

Form completed by \_\_\_\_\_ Signature \_\_\_\_\_ Date \_\_\_\_/\_\_\_\_/\_\_\_\_  
(please print name) dd mm yyyy
